# Supplementary material for: Production costs and potential prices for biosimilars of human insulin and insulin analogues
Source: PubMed Central journal article supplement — BMJ Glob Health. 2018 Sep 25;3(5):e000850. doi: 10.1136/bmjgh-2018-000850 (PMC6157569; doi:10.1136/bmjgh-2018-000850), 2018-09-25
Supplement: bmjgh-2018-000850supp001.pdf [file bmjgh-2018-000850supp001.pdf]

## Supplementary material

Supplementary figure 1. Cost per kilogram (USD) and linear regression of regular human insulin API exported from India 1 Jan 2013 to 1 Nov 2016.

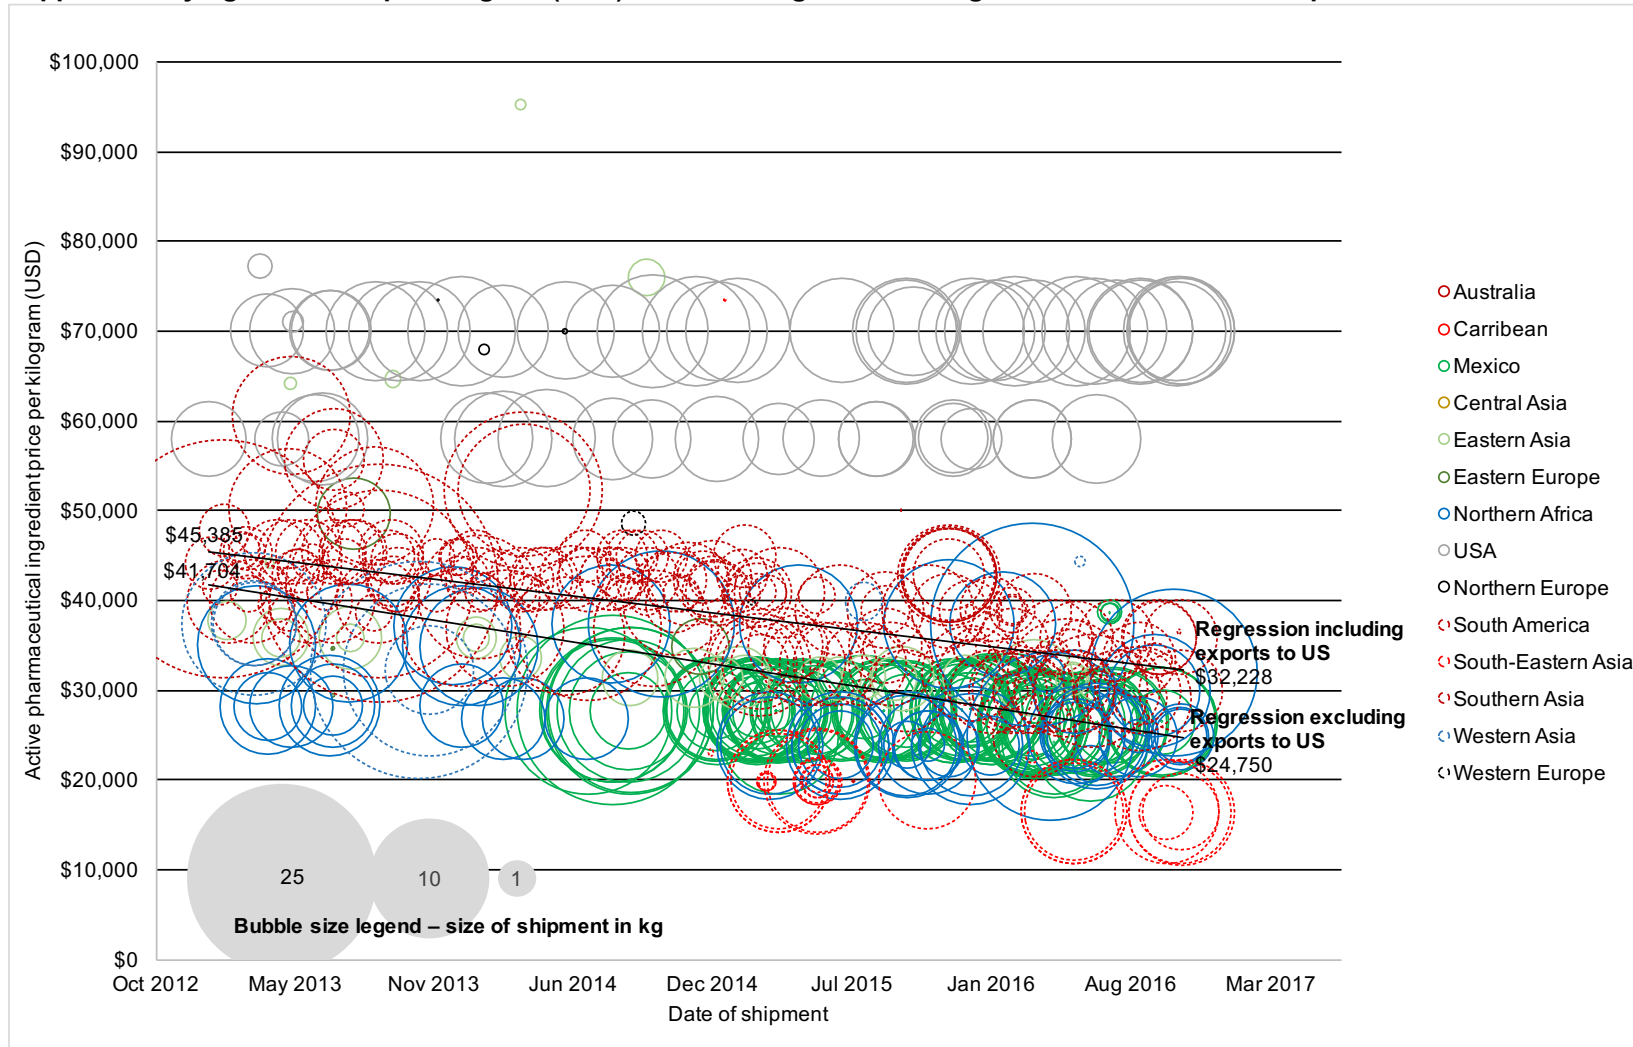

Over the period of 3 year and 10 months, the top export destinations by volume were Mexico (826kg), followed by the US (356kg), Iran (254kg), Bangladesh (249kg), Morocco (218kg), and Pakistan (199kg).

Supplementary figure 2. Cost per kilogram (USD) and linear regression of insulin glargine API exported from India 1 Jan 2013 to 1 Nov 2016.

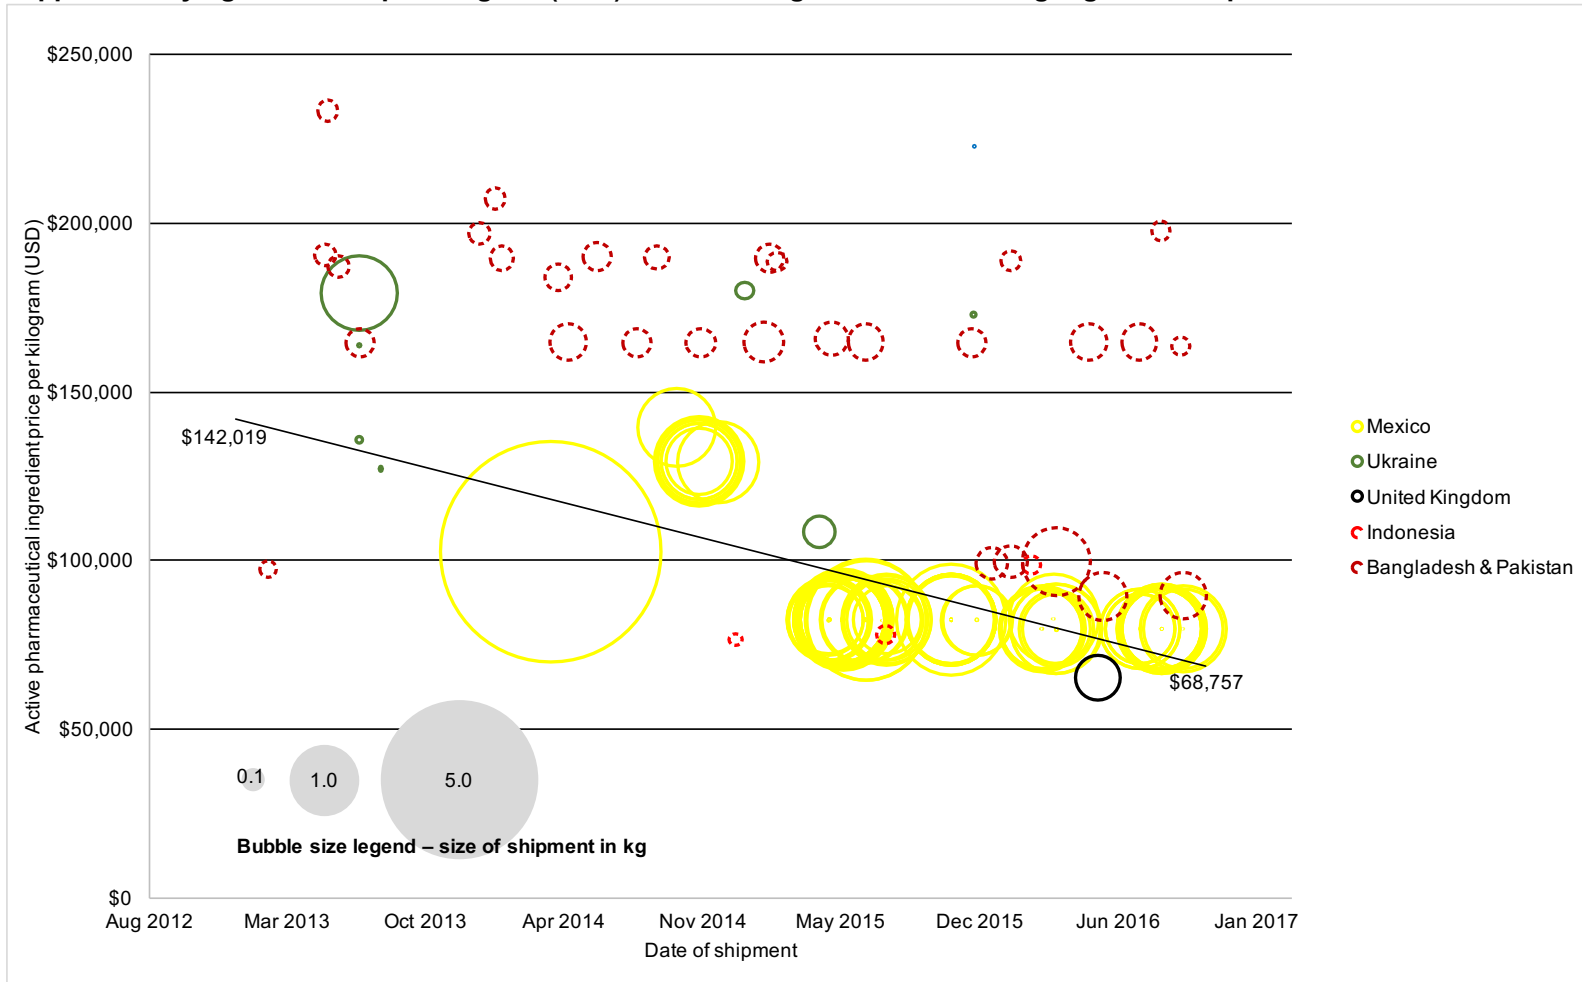

Over the period of 3 year and 10 months, the top export destinations by volume were Mexico (113kg), followed by Bangladesh (6kg), Ukraine (2kg), United Kingdom (1kg), and Pakistan (1kg).

**Supplementary figure 3. Comparison of molecular structures of human insulin and insulin analogues.**

**Recombinant human insulin**

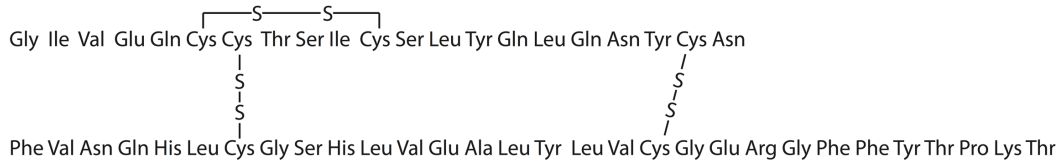

**Insulin aspart**

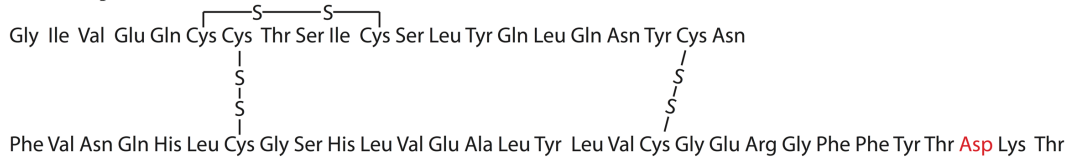

**Insulin lispro**

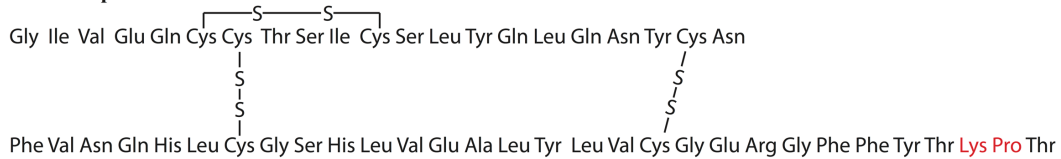

**Insulin glulisine**

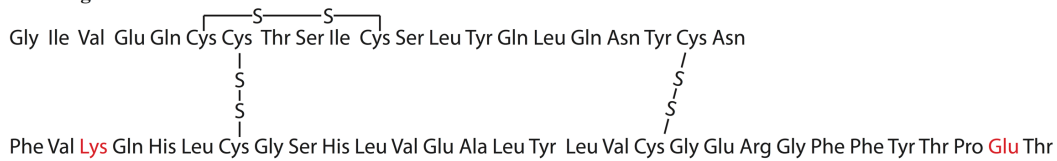

**Insulin glargine**

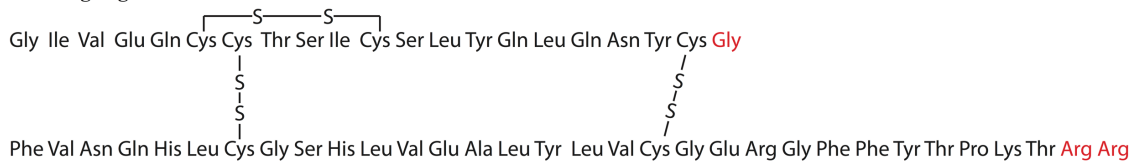

**Insulin detemir**

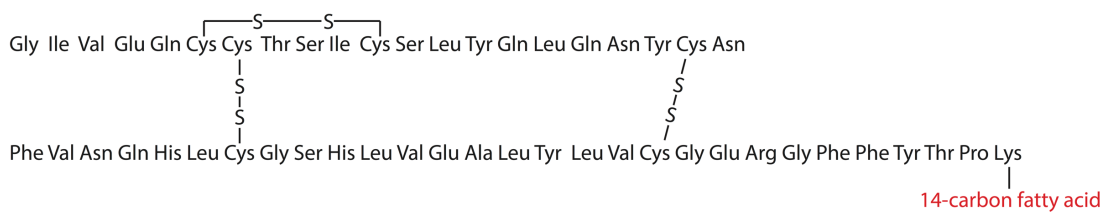

**Insulin degludec**

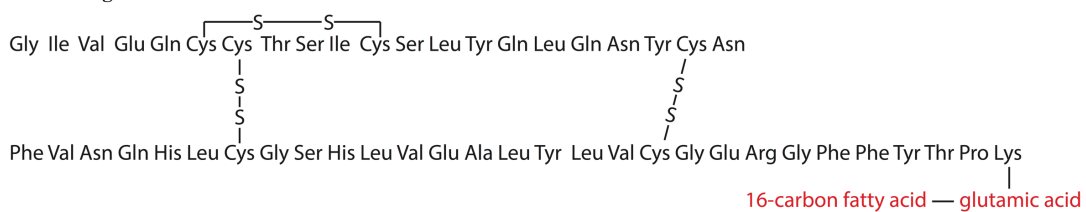

### **Dosage of insulins in milligrams**

Regular human insulin 100 units = 3.50mg

Insulin NPH 100 units = 3.91mg

Lispro 100 units = 3.50mg

Aspart 100 units = 3.50mg

Glulisine 100 units = 3.49mg

Glargine 100 units = 3.64mg

Detemir 100 units = 14.20mg

Degludec 100 units = 3.66mg

Source: Summary of Product Characteristics available from [www.medicines.org.uk](http://www.medicines.org.uk).

## Excipient cost

| Item                               | Price (USD/kg) | Reference                                                                                                                                                                   |
|------------------------------------|----------------|-----------------------------------------------------------------------------------------------------------------------------------------------------------------------------|
| M-Cresol                           | 57.47          | <a href="http://www.emdmillipore.com/US/en/product/m-Cresol,MDA_CHEM-809691">http://www.emdmillipore.com/US/en/product/m-Cresol,MDA_CHEM-809691</a>                         |
| Phenol                             | 133.00         | <a href="http://www.emdmillipore.com/US/en/product/Phenol,MDA_CHEM-822296">http://www.emdmillipore.com/US/en/product/Phenol,MDA_CHEM-822296</a>                             |
| Zinc oxide                         | 133.00         | <a href="http://www.sigmaaldrich.com/catalog/product/sigald/14439?lang=en&amp;region=US">http://www.sigmaaldrich.com/catalog/product/sigald/14439?lang=en&amp;region=US</a> |
| Glycerin                           | 47.82          | <a href="http://www.sigmaaldrich.com/catalog/product/sial/g2289?lang=en&amp;region=US">http://www.sigmaaldrich.com/catalog/product/sial/g2289?lang=en&amp;region=US</a>     |
| Sodium phosphate dibasic dehydrate | 73.20          | <a href="http://www.sigmaaldrich.com/catalog/product/sigald/30435?lang=en&amp;region=US">http://www.sigmaaldrich.com/catalog/product/sigald/30435?lang=en&amp;region=US</a> |
| Sodium chloride                    | 15.52          | <a href="http://www.sigmaaldrich.com/catalog/product/mm/106400?lang=en&amp;region=US">http://www.sigmaaldrich.com/catalog/product/mm/106400?lang=en&amp;region=US</a>       |
| Water for injection                | 8.51           | <a href="http://www.sigmaaldrich.com/catalog/product/mm/486505?lang=en&amp;region=US">http://www.sigmaaldrich.com/catalog/product/mm/486505?lang=en&amp;region=US</a>       |
| Polysorbate-20                     | 507.00         | <a href="http://www.sigmaaldrich.com/catalog/product/sial/44112?lang=en&amp;region=US">http://www.sigmaaldrich.com/catalog/product/sial/44112?lang=en&amp;region=US</a>     |

All hyperlinks accessed June 15, 2017.

HCl and NaOH for buffering not included in excipient cost calculation.

## Excipient content of vials

Except where indicated otherwise, composition of vials is from Niazi SK. Handbook of Pharmaceutical Manufacturing Formulations, Second Edition: Sterile Products. New York: Informa Healthcare USA, Inc.; 2009.

### Insulin aspart

| Component                             | Cost per kg (USD) | Amount per 1mL | Cost per 10mL vial (USD) |
|---------------------------------------|-------------------|----------------|--------------------------|
| Glycerin                              | 47.82             | 16mg           | 0.0076512                |
| Phenol                                | 133.00            | 1.5mg          | 0.001995                 |
| M-Cresol                              | 57.47             | 1.72mg         | 0.000988484              |
| Zinc oxide                            | 133.00            | 19.6mg         | 0.026068                 |
| Disodium hydrogen phosphate dihydrate | 73.20             | 1.25mg         | 0.000915                 |
| Sodium chloride                       | 15.52             | 0.58mg         | 0.000090016              |
| Water for injection                   | 8.55              | 1g             | 0.08545                  |
|                                       |                   | <b>Total:</b>  | 0.1231577                |

### Insulin glargine

| Component           | Cost per kg (USD) | Amount per 1mL | Cost per 10mL vial (USD) |
|---------------------|-------------------|----------------|--------------------------|
| Glycerol 85%        | 47.82             | 20mg           | 0.0076512                |
| Phenol              | 133.00            | 1.5mg          | 0.001995                 |
| M-Cresol            | 57.47             | 2.7mg          | 0.00155169               |
| Zinc oxide          | 133.00            | 30mg           | 0.0399                   |
| Water for injection | 8.55              | 1g             | 0.08545                  |
|                     |                   | <b>Total:</b>  | 0.13654789               |

### Insulin NPH

| Component                | Cost per kg (USD) | Amount per 1mL | Cost per 10mL vial (USD) |
|--------------------------|-------------------|----------------|--------------------------|
| Zinc oxide               | 133.00            | 0.012mg        | 0.00001596               |
| Liquefied phenol         | 133.00            | 0.73mg         | 0.0009709                |
| Metacresol               | 57.47             | 1.6mg          | 0.00091952               |
| Glycerin                 | 47.82             | 16mg           | 0.0076512                |
| Sodium phosphate dibasic | 73.20             | 3.78mg         | 0.00276696               |
| Water for injection      | 8.55              | 1g             | 0.08545                  |
|                          |                   | <b>Total:</b>  | 0.09777454               |

#### Insulin lispro

| Component                | Cost per kg (USD) | Amount per 1mL | Cost per 10mL vial (USD) |
|--------------------------|-------------------|----------------|--------------------------|
| Protamine sulfate        | 10,800.00         | 0.28 mg        | 0.03024                  |
| Glycerin                 | 47.82             | 16.00 mg       | 0.0076512                |
| Sodium phosphate dibasic | 73.20             | 3.78mg         | 0.00276696               |
| M-Cresol                 | 57.47             | 1.76mg         | 0.001011472              |
| Zinc ion                 | 133.00            | 0.025mg        | 0.00003325               |
| Liquefied phenol         | 133.00            | 0.715mg        | 0.00095095               |
| Water for injection      | 8.55              | 1.00g          | 0.08545                  |
|                          |                   | <b>Total:</b>  | 0.128103832              |

#### Regular human insulin

| Component           | Cost per kg (USD) | Amount per 1mL | Cost per 10mL vial (USD) |
|---------------------|-------------------|----------------|--------------------------|
| Metacresol          | 57.47             | 2.5 mg         | 0.00143675               |
| Glycerin            | 47.82             | 16 mg          | 0.0076512                |
| Water for injection | 8.55              | 1g             | 0.08545                  |
|                     |                   | <b>Total:</b>  | 0.09453795               |

#### Insulin glulisine

From Niazi SK. Biosimilars and Interchangeable Biologics: Strategic Elements. CRC Press. 2016.

| Component           | Cost per kg (USD) | Amount per 1mL | Cost per 10mL vial (USD) |
|---------------------|-------------------|----------------|--------------------------|
| Metacresol          | 57.47             | 3.15 mg        | 0.001810305              |
| Tromethamine        | 47.82             | 6 mg           | 0.0028692                |
| Sodium chloride     | 15.52             | 5mg            | 0.000776                 |
| Polysorbate-20      | 507.00            | 0.01mg         | 0.0000507                |
| Water for injection | 8.55              | 1g             | 0.08545                  |
|                     |                   | <b>Total:</b>  | 0.090956205              |

#### Insulin detemir and degludec

Excipients used in these formulations are the same as those used in the other analogues. Published information on the exact amounts of the excipients used in detemir and degludec could not be identified, so the excipient costs for these were conservatively assumed to be equal to the highest excipient cost across analogues – those for insulin glargine.

**Conversion and packing cost norms published by the Indian National Pharmaceuticals Pricing Authority in November 2012, pursuant to the Drugs (Prices Control) Order 1995.**

The norms are available from <http://www.nppaindia.nic.in/wh-new-2012/wh-new-29-2012.html> (accessed 28 Jul 2017).

| <b>Item</b>                    | <b>Cost per unit in 2012 Indian rupees</b> | <b>Cost per unit in 2017 US cents</b> |
|--------------------------------|--------------------------------------------|---------------------------------------|
| <i>Conversion cost</i>         |                                            |                                       |
| Sterile liquid vial 5–15mL     | 1.55                                       | 2.96                                  |
| <i>Packing cost</i>            |                                            |                                       |
| Liquid in vial >5mL            | 0.69                                       | 1.32                                  |
| <i>Packaging material cost</i> |                                            |                                       |
| Tubular glass vial 10mL        | 2.44                                       | 4.66                                  |
|                                | <b>Total:</b>                              | 8.94                                  |

2012 average exchange rate 1 USD = 55.911 INR

(source: <https://www.irs.gov/individuals/international-taxpayers/yearly-average-currency-exchange-rates> )

2012 to 2017 US inflation 6.7%

(source: <http://www.usinflationcalculator.com/> )

Adjustment for inflation was done by multiplying the 2012 value in Indian rupees by the 2012 average exchange rate, and then by the 2012-2017 US inflation factor.



**Lowest-priced items formulated as ampoules.**

| <b>Item</b>                        | <b>Price per unit in the UK (USD)</b> |
|------------------------------------|---------------------------------------|
| Ondansetron 4mg in 2mL ampoule     | 0.1092                                |
| Furosemide 20mg in 2mL ampoule     | 0.1196                                |
| Metoclopramide 10mg in 2mL ampoule | 0.1508                                |
| Morphine 10mg in 2mL ampoule       | 0.1599                                |
| Adrenaline 1mg in 1mL ampoule      | 0.1989                                |

Prices collected from the UK drugs and pharmaceutical electronic market information tool (eMit) in February 2017, available at <https://www.gov.uk/government/publications/drugs-and-pharmaceutical-electronic-market-information-emit>.

**Lowest-price items formulated as vials.**

| <b>Item</b>                 | <b>Price per unit in the UK (USD)</b> |
|-----------------------------|---------------------------------------|
| Ceftriaxone 1g in vial      | 0.6370                                |
| Dopamine 200mg in 5mL vial  | 0.6786                                |
| Vancomycin 250mg in vial    | 0.7215                                |
| Gentamicin 80mg in 2mL vial | 0.7800                                |
| Phenytoin 250mg in 5mL vial | 0.8476                                |

Prices collected from the UK drugs and pharmaceutical electronic market information tool (eMit) in February 2017, available at <https://www.gov.uk/government/publications/drugs-and-pharmaceutical-electronic-market-information-emit>.

### Broken down estimation of manufacturing costs and estimated biosimilar prices

| <b>Competitive formula</b>                         |                      |                                   |                 |               |               |                  |                |                 |
|----------------------------------------------------|----------------------|-----------------------------------|-----------------|---------------|---------------|------------------|----------------|-----------------|
| <b>Drug</b>                                        | <b>human insulin</b> | <b>neutral protamine Hagedorn</b> | <b>glargine</b> | <b>lispro</b> | <b>aspart</b> | <b>glulisine</b> | <b>detemir</b> | <b>degludec</b> |
| Cost of API (1 kg)                                 | \$19,800             | \$18,626                          | \$55,006        | \$80,000      | \$80,000      | \$80,000         | \$80,000       | \$80,000        |
| 1000 units in mg                                   | 35                   | 39.1                              | 36.4            | 35            | 35            | 34.9             | 142            | 36.6            |
| Cost of API for 1000 unit vial                     | \$0.69               | \$0.73                            | \$2.00          | \$2.80        | \$2.80        | \$2.79           | \$11.36        | \$2.93          |
| Cost of excipients for 1000 unit vial              | \$0.09               | \$0.10                            | \$0.14          | \$0.13        | \$0.12        | \$0.09           | \$0.14         | \$0.14          |
| Cost of API + excipients                           | \$0.79               | \$0.83                            | \$2.14          | \$2.93        | \$2.92        | \$2.88           | \$11.50        | \$3.06          |
| Adjust for 4.5% process loss of API and excipients | \$0.82               | \$0.86                            | \$2.23          | \$3.06        | \$3.05        | \$3.01           | \$12.01        | \$3.20          |
| Add cost of formulation at \$0.09/vial             | \$0.91               | \$0.95                            | \$2.32          | \$3.15        | \$3.14        | \$3.10           | \$12.10        | \$3.29          |
| Add cost of development                            | \$2.28               | \$2.32                            | \$3.69          | \$4.52        | \$4.51        | \$4.47           | \$13.47        | \$4.66          |
| <b>Total cost of production</b>                    | <b>\$2.28</b>        | <b>\$2.32</b>                     | <b>\$3.69</b>   | <b>\$4.52</b> | <b>\$4.51</b> | <b>\$4.47</b>    | <b>\$13.47</b> | <b>\$4.66</b>   |
| Add costs of transportation and customs at 20%     | \$2.74               | \$2.79                            | \$4.43          | \$5.42        | \$5.42        | \$5.37           | \$16.17        | \$5.59          |
| Add profit margin at 20%                           | \$3.29               | \$3.35                            | \$5.32          | \$6.51        | \$6.50        | \$6.44           | \$19.40        | \$6.71          |
| <b>Total estimated biosimilar price</b>            | <b>\$3.29</b>        | <b>\$3.35</b>                     | <b>\$5.32</b>   | <b>\$6.51</b> | <b>\$6.50</b> | <b>\$6.44</b>    | <b>\$19.40</b> | <b>\$6.71</b>   |
| <b>Conservative formula</b>                        |                      |                                   |                 |               |               |                  |                |                 |
| Cost of API (1 kg)                                 | \$24,750             | \$23,282                          | \$68,757        | \$100,000     | \$100,000     | \$100,000        | \$100,000      | \$100,000       |
| 1000 units in mg                                   | 35                   | 39.1                              | 36.4            | 35            | 35            | 34.9             | 142            | 36.6            |
| Cost of API for 1000 unit vial                     | \$0.87               | \$0.91                            | \$2.50          | \$3.50        | \$3.50        | \$3.49           | \$14.20        | \$3.66          |
| Cost of excipients for 1000 unit vial              | \$0.09               | \$0.10                            | \$0.14          | \$0.13        | \$0.12        | \$0.09           | \$0.14         | \$0.14          |
| Cost of API + excipients                           | \$0.96               | \$1.01                            | \$2.64          | \$3.63        | \$3.62        | \$3.58           | \$14.34        | \$3.80          |
| Adjust for 4.5% process loss of API and excipients | \$1.00               | \$1.05                            | \$2.76          | \$3.79        | \$3.79        | \$3.74           | \$14.98        | \$3.97          |
| Add cost of formulation at \$1.00/vial             | \$2.00               | \$2.05                            | \$3.76          | \$4.79        | \$4.79        | \$4.74           | \$15.98        | \$4.97          |
| Add cost of development                            | \$3.37               | \$3.42                            | \$5.13          | \$6.16        | \$6.16        | \$6.11           | \$17.35        | \$6.34          |
| <b>Total cost of production</b>                    | <b>\$3.37</b>        | <b>\$3.42</b>                     | <b>\$5.13</b>   | <b>\$6.16</b> | <b>\$6.16</b> | <b>\$6.11</b>    | <b>\$17.35</b> | <b>\$6.34</b>   |
| Add costs of transportation and customs at 20%     | \$4.05               | \$4.11                            | \$6.15          | \$7.39        | \$7.39        | \$7.33           | \$20.82        | \$7.60          |
| Add profit margin at 20%                           | \$4.86               | \$4.93                            | \$7.38          | \$8.87        | \$8.86        | \$8.80           | \$24.99        | \$9.13          |
| <b>Total estimated biosimilar price</b>            | <b>\$4.86</b>        | <b>\$4.93</b>                     | <b>\$7.38</b>   | <b>\$8.87</b> | <b>\$8.86</b> | <b>\$8.80</b>    | <b>\$24.99</b> | <b>\$9.13</b>   |

## Estimation of per-unit cost of production based on companies' reports

As a point of comparison to our estimates of biosimilar price based in API cost, we sought to estimate the cost of production deriving from originator companies' reported cost of goods sold.

Novo Nordisk, Lilly, and Sanofi together control 96% of the global market for insulins by volume.<sup>1</sup> All three companies reports their 'cost of goods sold' (COGS; i.e. the costs of manufacturing their products) as a percentage of their total sales.<sup>2-4</sup> As they do not report the total number of items sold, or COGS broken down by product, this cannot be directly translated to a precise per-product cost of production.

In 2016 Novo Nordisk reported that "28 million patients use [their] diabetes care products".<sup>2</sup> We used this number to estimate the COGS per item. We were unable to identify similar numbers for Lilly or Sanofi that would allow an estimate of the number of items sold.

The cost of production per insulin item can be estimated by combining total sales figures with their reported percentage of sales spent on COGS and estimates for the number of insulin items sold per year (this must be estimated because Novo Nordisk does not report the exact number of items sold).

As Novo Nordisk produces some diabetes products that are not used in type 1 diabetes (liraglutide, semaglutide, repaglinide), we assumed that 80% of these 28 million patients are using Novo Nordisk insulins (22.4 million) rather than other products. The World Health Organization defines the Defined Daily Dose (DDD) for insulin as 40 units,<sup>5</sup> equivalent to 14,600 units per year. Depending on the size of the vial used – 300 units or 1000 units – this would be equivalent to about 15 or 50 vials, respectively, per year. Assuming 22.4 million people use between 15 and 50 vials/cartridges of insulin in a year, and assuming that between half and all of their yearly insulin use is with products sold by Novo Nordisk (7.5–15 vials/pens per year if all are 1000 units and 25–50 vials per year if all are 300 units), this is equivalent to 168–336 million items sold annually if all items contain 1000 unit and 560–1,120 million items sold annually if all items contain 300 units.

| Total sales of insulin | Reported COGS as percentage of sales | Total COGS for insulins | Estimated items sold                                     | Estimated COGS per item |
|------------------------|--------------------------------------|-------------------------|----------------------------------------------------------|-------------------------|
| US\$10.1 billion*      | 16% (diabetes and obesity products)* | US\$1.62 billion        | <i>Assuming all items contain 1000 units of insulin:</i> |                         |
|                        |                                      |                         | 168-336 million                                          | \$4.82–\$9.64           |
|                        |                                      |                         | <i>Assuming all items contain 300 units of insulin:</i>  |                         |
|                        |                                      |                         | 560-1,120 million                                        | \$1.45–2.89             |

COGS – cost of good sold, i.e. production costs. Assumed 1 DKK = 0.16 USD

\*Figures from Novo Nordisk's 2016 Annual Report.<sup>2</sup>

- Beran D, Ewen M, Laing R. Access to insulin - Current Challenges & Constraints. 2015. <http://apps.who.int/medicinedocs/documents/s22269en/s22269en.pdf>.
- Novo Nordisk. Annual report. 2016. <https://www.novonordisk.com/content/dam/Denmark/HQ/AnnualReport/2016/PDF/Novo-Nordisk-Annual-Report-2016.pdf> (accessed Jan 25, 2018).
- Eli Lilly and Company. 2016 Financial Report. 2016. <http://files.shareholder.com/downloads/LLY/5382793911x0x933961/450B26F2-F56C-44B0-8AEB-3E15E98D24D8/English.PDF> (accessed Oct 16, 2017).
- Sanofi. Form 20-F. 2016. [https://www.sanofi.com/media/Project/One-Sanofi-Web/sanofi-com/en/investors/docs/20-F\\_2016.pdf](https://www.sanofi.com/media/Project/One-Sanofi-Web/sanofi-com/en/investors/docs/20-F_2016.pdf) (accessed Feb 25, 2018).
- WHO Collaborating Centre for Drug Statistics Methodology. ATC/DDD Index 2018. [https://www.whocc.no/atc\\_ddd\\_index/](https://www.whocc.no/atc_ddd_index/) (accessed Jan 25, 2018).
